# Supplementary material
Source: Springer Nature journal article supplement (https://www.springermedizin.de/resource/supplementary/12885_2013_4433_MOESM2_ESM.pdf/9466258)
Supplement: MOESM2 [file 9466258]

Referral by oncologists/urologists in Western Australia, Queensland and New South Wales

Screening, familiarisation session and baseline testing

Patients stratified and randomised (n = 240)

Exercise  
(n = 80)

Exercise + Psychosexual  
(n = 80)

Usual Care  
(n = 80)

Receive allocated  
intervention for 6 months

Receive allocated  
intervention for 6 months

Maintain usual care for  
6 months

Post-intervention testing

Post-usual care testing

Receive allocated  
intervention for 6 months

6 month follow-up testing (questionnaires only)

Post-intervention testing

1 year follow-up testing

6 month follow-up testing  
(questionnaires only)

1 year follow-up testing
